# Supplementary material for: Drosophila as model system to study Ras-mediated oncogenesis: the case of the tensin family of proteins
Source: Preprints.org preprint supplement (doi:10.20944/preprints202307.0502.v1), 2023-07-10
Supplement: Supplementary file 1 [file Supplementary Figure Legends.docx]

**Supplementary Figure Legends.**

**Supplementary Figure 1: Elimination of *by* or *PVRAP* increases cell proliferation in RasV12 expressing wing discs**.

(A-F) Maximal projection of confocal views of 3rd instar larvae wing discs, expressing GFP (green) and the indicated UAS transgenes under the control of *apGal4*, in control and mutant backgrounds, stained with anti-GFP (green), PH3 (red) and Hoechst (DNA, blue). (G) Violin plots of the number of PH3+ cells per GFP area (G). The statistical significance of differences was assessed with a welch-test, ****P value<0.0001. Scale bars 50 μm.

**Supplementary Figure 2: Cell polarity is not affected by the removal of *by* or *PVRAP* either in normal or RasV12 conditions.** (A-F) Confocal images of 3rd instar wing discs of the indicated genotypes stained with anti-GFP (green), anti-aPKC (red) and Hoechst (DNA, blue). (A’-F’ and A”-F”) Confocal xz sections along the white dotted lines of wing discs shown in A-F. The apical side of wing discs is at the right. Scale bars, 30 μm (A-F).  

**Supplementary Figure 3: Apoptosis of nearby wild type tissue due to RasV12 overexpression is not affected by elimination of wither *by* or *PVRAP*.** (A-F) Maximal projection of confocal views of wing imaginal discs from third-instar larvae expressing GFP (green) and the indicated UAS transgenes under the control of ap*Gal4*, stained with anti-GFP (green), anti-Dcp-1 (red in A-F, white in A’-F’) and Hoechst (DNA, blue). (G) Violin plots of mean fluorescent Dcp-1 intensities at the D/V boundary of wing discs with the designated genotypes. The statistical significance of differences was assessed with a welch-test, **** and *** P values <0.0001 and <0.001, respectively. Scale bars 50 μm.

**Supplementary Figure 4:** **Elimination of either** ***by* or *PVRAP* does not affect the migratory capacity of RasV12 wing disc expressing cells.** (A-F) Maximal projection of confocal views of 3rd instar wing discs expressing GFP (green) and the indicated UAS transgenes under the control of ap*Gal4*, stained with anti-GFP (green). (G) Bar plot representing the presence or absence of GFP+ cells in the ventral domain. (H) Violin plots showing the distance at which GFP+ cells are found with respect to the D/V boundary. The statistical significance of differences was assessed with a xi-square (G) and welch-test (H), **** P values <0.0001. Scale bars 50 μm.
